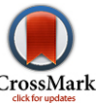

## Correction

# Correction: Interacting Symbionts and Immunity in the Amphibian Skin Mucosome Predict Disease Risk and Probiotic Effectiveness

## The PLOS ONE Staff

There is a missing affiliation for co-author, Jos Kielgast. The correct affiliations are:

Section for Freshwater Biology, Department of Biology, University of Copenhagen, Copenhagen, Denmark

Center for Macroecology, Evolution and Climate Natural History Museum of Denmark Universitetsparken 15, DK-2100, Denmark

## Reference

1. Woodhams DC, Brandt H, Baumgartner S, Kielgast J, Küpfer E, et al. (2014) Interacting Symbionts and Immunity in the Amphibian Skin Mucosome Predict Disease Risk and Probiotic Effectiveness. PLoS ONE 9(4): e96375. doi:10.1371/journal.pone.0096375

**Citation:** The PLOS ONE Staff (2014) Correction: Interacting Symbionts and Immunity in the Amphibian Skin Mucosome Predict Disease Risk and Probiotic Effectiveness. PLoS ONE 9(7): e104590. doi:10.1371/journal.pone.0104590

**Published:** July 30, 2014

**Copyright:** © 2014 The PLOS ONE Staff. This is an open-access article distributed under the terms of the Creative Commons Attribution License, which permits unrestricted use, distribution, and reproduction in any medium, provided the original author and source are credited.
